# Supplementary material
Source: PubMed Central journal article supplement (PMC6309870)
Supplement: NIHMS999185-supplement-Supplement.pdf [file NIHMS999185-supplement-Supplement.pdf]

| NCBI Acc. Num. | Gene name         | Forward sequence (5'-3') | Reverse sequence (5'-3') | Size (bp) |
|----------------|-------------------|--------------------------|--------------------------|-----------|
| NM_008987.3    | h-PTX3            | TGTTGAGATGGCCACAGG       | TCAGACCTTCCCAACTGG       | 341       |
| NM_005195.3    | h-CEBPD           | AGCGCAACAACATCGCCGTG     | GTCGGGTCTGAGGTATGGGTC    | 267       |
| NM_002046.3    | h-GAPDH           | CCATCACCATCTTCCAGGAG     | CCTGCTCACCACCTTCTTG      | 576       |
| NM_003467.2    | h-CXCR4           | CTCAAGATCCTCTCCAAAGG     | TGATTCACTACACGCTCTGG     | 373       |
| NM_030641.3    | h-APOL6           | TGAAGTCTTCTACCTGGAGG     | ATTGGTCTGTCCAGAAAGG      | 188       |
| NM_001638.2    | h-APOF            | AGTCACAGGGTTTGGTTTCG     | CTACAAGCGTGCATAACTCC     | 369       |
| NM_007115.2    | h-TNFAIP6         | TGATGCTTCAGTGACAGCTG     | TGCAGTGGGATTATGAGAGG     | 333       |
| NM_002421.2    | h-MMP1            | GTGTGAGTCCAAAGAAGGTG     | TCTTGAGCTGCTTTTCCTCC     | 355       |
| NM_002425.1    | h-MMP10           | GGAAATGAGGTACAAGCAGG     | CAGTCACAGAACATGCAGG      | 450       |
| NM_000743.2    | h-CHRNA3          | TTCTCAGCCTTAGCACTACG     | TGGCATCTAGTGAGTTGAGG     | 120       |
| NM_006072.4    | h-CCL26           | CTTCCAATACAGCCACAAGC     | TTCCTTGGATGGGTACAGAC     | 132       |
| NM_004244.4    | h-CD163           | AGCTGATTTCAGTGCTGCTG     | AGCAGCAGTCTTAGGAATCC     | 250       |
| NM_138621.3    | h-BCL2L11         | AAGAAGCATCCTCAAGCTCC     | AATGCTACATACGCTGGGTC     | 212       |
| NM_001901.2    | h-CTGF            | CTGTGATTAGACTGGACAG      | AGTGAGGCTACCACATTTCC     | 380       |
| NM_002007.2    | h-FGF4            | GCACGTTCAAGGAGATTCTC     | TCATCCGAAGAAAGTGCACC     | 243       |
| NM_000514.2    | h-GDNF            | CAGTGCTTCCTAGAAGAGAG     | TTGTCGTACGTTGTCTCAGC     | 223       |
| NM_006206.4    | h-PDGFR $\alpha$  | AAGCTGTATCACTGCCTTCG     | TCTCACACATTCACCACACC     | 160       |
| NM_145733.2    | h-SEPT3           | TTGCGAATGTTGACTGCCAC     | TTGTTCTTGCATCCCCTAGG     | 179       |
| NM_003246.2    | h-THBS1           | GCTCAGAGTGGATGTTATGG     | GGGAATACTTCTCTGCAGAG     | 376       |
| NM_016083.3    | h-CNR1            | GTCAGATGTTTGAGCAGTGG     | GTTGCAACGATGTTACCAGC     | 293       |
| NM_001841.1    | h-CNR2            | CACACAGTCTGTTGGATAGG     | AGAGAGAAGACCTGGATGTC     | 243       |
| NM_008987.3    | m-PTX3            | AGTTGAAGGGAAGGCTTGAG     | TGAACAATGGGCAACAGAGC     | 241       |
| NM_007679.4    | m-CEBPD           | ATCGCTGCAGCTTCCTATGT     | GGTTAAGCCCGCAAACATTA     | 429       |
| NM_001101.3    | h- $\beta$ -ACTIN | TCTTCATTGTGCTGGGTGCCA    | TCTTCATGGTGTAGGAGCCA     | 250       |

NCBI Acc. Num. : NCBI Accession Number ; h- : human ; m- : mouse

**Supplemental Table 1:** Primers list for RT-PCR

**Up-regulated**

| <b>Gene name</b> | <b>Sys. Num.</b> | <b>Function</b>                                                                                              |
|------------------|------------------|--------------------------------------------------------------------------------------------------------------|
| ID2              | NM_002166        | Inflammation, Neurological Disease, and Cellular Growth and Proliferation                                    |
| BCL2L11          | NM_138621        | Inflammation, Neurological Disease, Cell Death, Hematological Disease, and Cellular Growth and Proliferation |
| CXCR4            | NM_001008540     | Inflammation, Neurological Disease, Cell Death, Hematological Disease, and Cellular Growth and Proliferation |
| CASP8            | NM_033355        | Inflammation, Neurological Disease, Hematological Disease, Cell Death, and Cellular Growth and Proliferation |
| ITGA2            | NM_002203        | Inflammation and Neurological Disease                                                                        |
| ALB              | NM_000477        | Inflammation, Cell Death, Hematological Disease, and Cellular Growth and Proliferation                       |
| KITLG            | NM_000899        | Inflammation, Neurological Disease, Cell Death, Hematological Disease, and Cellular Growth and Proliferation |
| ABCA1            | NM_005502        | Inflammation and Hematological Disease                                                                       |
| EGR3             | NM_004430        | Inflammation, Cell Death, Hematological Disease, and Cellular Growth and Proliferation                       |
| MMP1             | NM_002421        | Inflammation and Neurological Disease, Cell Death                                                            |
| SLC1A1           | NM_004170        | Neurological Disease                                                                                         |
| CHRNA3           | NM_000743        | Neurological Disease and Hematological Disease                                                               |
| GABRE            | NM_021990        | Neurological Disease                                                                                         |
| MAOB             | NM_000898        | Neurological Disease                                                                                         |
| BARHL1           | NM_020064        | Neurological Disease                                                                                         |
| MT1E             | AF495759         | Neurological Disease, Cell Death, Hematological Disease, and Cellular Growth and Proliferation               |
| MT1F             | NM_005949        | Neurological Disease, Cell Death, Hematological Disease, and Cellular Growth and Proliferation               |
| BMF              | NM_001003940     | Cell Death and Cellular Growth and Proliferation                                                             |
| PDGFRA           | NM_006206        | Cell Death, Hematological Disease, and Cellular Growth and Proliferation                                     |
| SKI              | ENST00000378536  | Cell Death and Cellular Growth and Proliferation                                                             |
| CEBPA            | NM_004364        | Cell Death, Hematological Disease, and Cellular Growth and Proliferation                                     |
| MMP10            | NM_002425        | Cell Death                                                                                                   |
| MYC              | NM_002467        | Cell Death, Hematological Disease, and Cellular Growth and Proliferation                                     |
| CEBPE            | NM_001805        | Cell Death, Hematological Disease, and Cellular Growth and Proliferation                                     |
| CA2              | NM_000067        | Cell Death                                                                                                   |
| PRLR             | NM_000949        | Cell Death, Hematological Disease, and Cellular Growth and Proliferation                                     |
| MMP3             | NM_002422        | Cell Death and Cellular Growth and Proliferation                                                             |
| ALDOA            | NM_184041        | Hematological Disease                                                                                        |
| PTX3             | NM_002852        | Hematological Disease                                                                                        |
| TNFAIP6          | NM_007115        | Cellular Growth and Proliferation                                                                            |
| RGS2             | NM_002923        | Cellular Growth and Proliferation                                                                            |
| IL22RA1          | NM_021258        | Inflammation                                                                                                 |
| CCL26            | NM_006072        | Inflammation, Cellular Movement, and Cellular Development                                                    |
| MARK1            | NM_018650        | Kinase Activity                                                                                              |
| LHX6             | NM_014368        | Organ Development, Cellular Movement, Cellular Development, and Nervous System Development and Function      |
| ETV1             | NM_004956        | Tissue Development, Skeletal and Muscular System Development and Function, and Genetic Disorder              |
| ADAMTS5          | NM_007038        | Inflammatory Disease, Connective Tissue Disorders, and Skeletal and Muscular Disorders                       |
| S100A5           | NM_002962        | Calcium Ion Binding                                                                                          |
| LRRK2            | NM_198578        | Inflammation, Connective Tissue Disorders, and Post-Translational Modification                               |
| RHOA             | NM_021205        | Cellular Development, Cell Morphology, and Cellular Assembly and Organization                                |
| ME1              | NM_002395        | Small Molecule Biochemistry and Energy Production                                                            |
| APOL6            | NM_030641        | Lipid Binding and Lipid Transporter Activity                                                                 |
| RGS16            | NM_002928        | Genetic Disorder and Gene Expression                                                                         |
| IL1F7            | NM_014439        | Inflammation                                                                                                 |
| NOX3             | NM_015718        | Superoxide-Generating NADPH Oxidase Activity                                                                 |
| NPL              | NM_030769        | N-Acetylneuraminase Lyase Activity and Lyase Activity                                                        |
| RIMS3            | NM_014747        | Genetic Disorder                                                                                             |
| MT1M             | NM_176870        | Genetic Disorder                                                                                             |

**Supplemental Table 2: CEBPD-responsive genes in U373MG cells**

**Down-regulated**

| <b>Gene name</b> | <b>Sys. Num</b> | <b>Function</b>                                                                                                                                  |
|------------------|-----------------|--------------------------------------------------------------------------------------------------------------------------------------------------|
| FGF4             | NM_002007       | Inflammation, Cell Death, Hematological Disease, and Cellular Growth and Proliferation                                                           |
| ABL1             | NM_005157       | Inflammation                                                                                                                                     |
| ADAMTS13         | NM_139025       | Inflammation, Hematological Disease                                                                                                              |
| THBS1            | NM_003246       | Inflammation, Cell Death, Hematological Disease, and Cellular Growth and Proliferation                                                           |
| SYK              | NM_003177       | Inflammation, Cell Death, Hematological Disease, and Cellular Growth and Proliferation                                                           |
| BCL2L1           | NM_001191       | Inflammation, Neurological Disease, Cell Death, Hematological Disease, and Cellular Growth and Proliferation                                     |
| AKT1             | NM_005163       | Inflammation, Neurological Disease, Cell Death, Hematological Disease, and Cellular Growth and Proliferation                                     |
| DTX1             | NM_004416       | Inflammation                                                                                                                                     |
| BAX              | NM_138765       | Inflammation, Neurological Disease, Cell Death, Hematological Disease, and Cellular Growth and Proliferation                                     |
| SRF              | NM_003131       | Inflammation, Cell Death, and Cellular Growth and Proliferation                                                                                  |
| CACNA2D2         | NM_001005505    | Neurological Disease, Cell Death, and Cellular Growth and Proliferation                                                                          |
| CHRND            | NM_000751       | Neurological Disease and Hematological Disease                                                                                                   |
| NFATC4           | NM_004554       | Neurological Disease                                                                                                                             |
| ALK              | NM_004304       | Neurological Disease                                                                                                                             |
| GDNF             | ENST00000381827 | Neurological Disease, Cell Death, Hematological Disease, and Cellular Growth and Proliferation                                                   |
| CDK2             | NM_001798       | Neurological Disease                                                                                                                             |
| PTPRF            | NM_002840       | Neurological Disease                                                                                                                             |
| SERPINC1         | NM_000488       | Cell Death, Hematological Disease, and Cellular Growth and Proliferation                                                                         |
| ALDH1A2          | NM_170697       | Cell Death and Cellular Growth and Proliferation                                                                                                 |
| KRT18            | L32537          | Cell Death                                                                                                                                       |
| IRF5             | NM_002200       | Cell Death and Hematological Disease                                                                                                             |
| ANKS1B           | NM_181670       | Cell Death                                                                                                                                       |
| RPS6KA5          | NM_182398       | Cell Death                                                                                                                                       |
| CTGF             | NM_001901       | Cell Death, Hematological Disease, and Cellular Growth and Proliferation                                                                         |
| STK11            | NM_000455       | Cell Death and Cellular Growth and Proliferation                                                                                                 |
| ABCB1            | NM_003742       | Cell Death, Hematological Disease, and Cellular Growth and Proliferation                                                                         |
| IL1RAP           | NM_002182       | Hematological Disease                                                                                                                            |
| HSD11B1          | NM_181755       | Hematological Disease and Cellular Growth and Proliferation                                                                                      |
| CD163            | NM_004244       | Cellular Growth and Proliferation                                                                                                                |
| SRI              | NM_003130       | Organ Development, Cardiovascular System Development and Function, Tissue Development, and Skeletal and Muscular System Development and Function |
| RIMS1            | NM_014989       | Genetic Disorder                                                                                                                                 |
| APOF             | NM_001638       | Lipid Transport                                                                                                                                  |
| ME3              | NM_001014811    | Small Molecule Biochemistry and Energy Production                                                                                                |
| SEN7             | NM_020654       | Peptidase Activity                                                                                                                               |
| ABCB11           | NM_003742       | Inflammation, Small Molecule Biochemistry, and Molecular Transport                                                                               |
| ETV7             | NM_016135       | Inflammation and Gene Expression                                                                                                                 |
| ADAMDEC1         | NM_014479       | Cancer and Genetic Disorder                                                                                                                      |
| SEPT3            | NM_145733       | Cell Cycle and Cytokinesis                                                                                                                       |
| ADAM11           | NM_002390       | Cell-Cell and Cell-Matrix Interactions                                                                                                           |
| APOBEC3D         | NM_152426       | Inhibits Retroviruses                                                                                                                            |
| BZRAP1           | NM_004758       | Benzodiazepine Receptor Binding                                                                                                                  |

**Supplemental Table 2: CEBPD-responsive genes in U373MG cells (continued)**

# 194 up-regulated genes ( $\geq 1.5$ )

(Ingenuity pathway analysis)  
IPA analysis

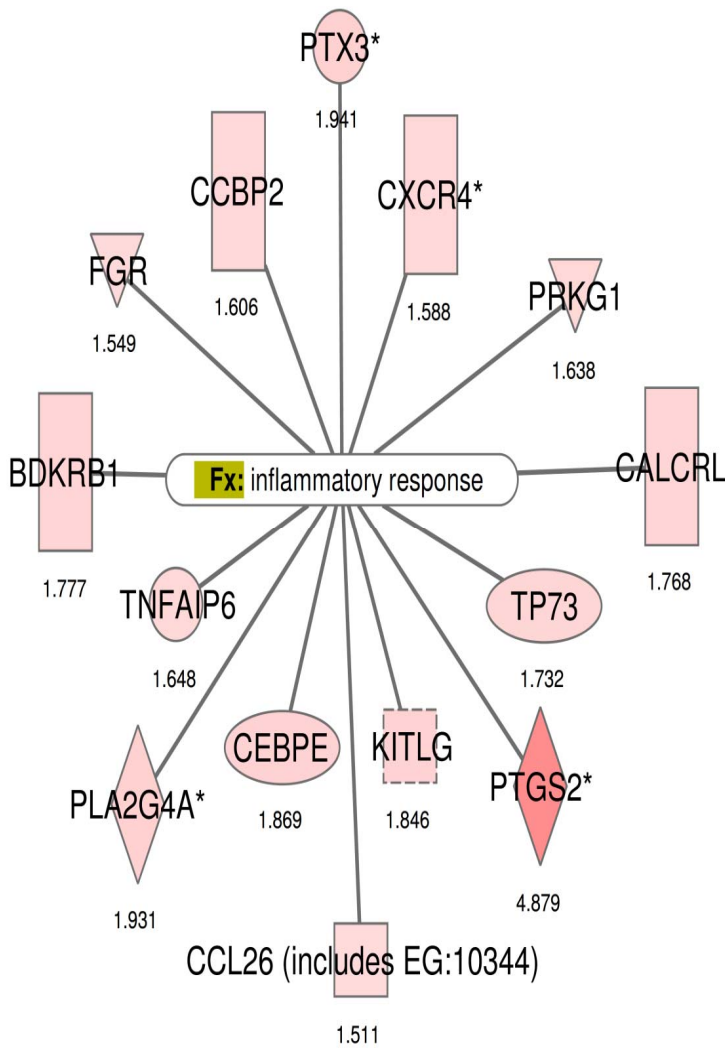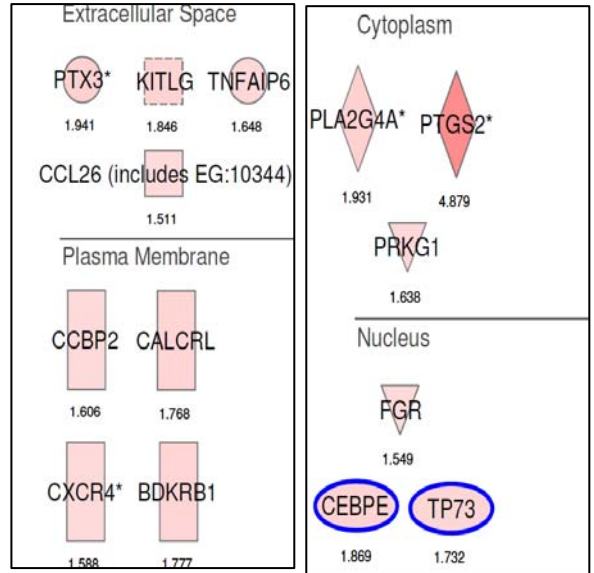

**Fx: phagocytosis**

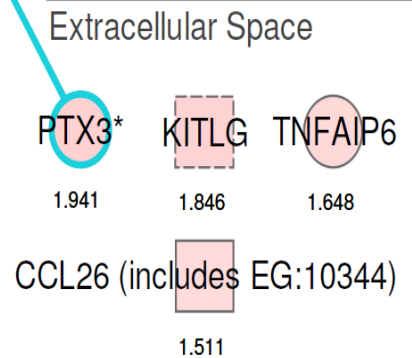

**Supplemental Figure 1.** Candidates respond to CEBPD induction. CEBPD up-regulated genes (194 genes, fold change  $\geq 1.5$ ) were subjected to Ingenuity pathway analysis (IPA). Gene function was suggested to involved in inflammatory response is shown in the left panel. Numbers under the genes represent the fold change upon CEBPD induction. Among these inflammation responsive factors, four proteins which could be secreted to extracellular space were identified (right panel).

<http://web.ibbt.ncku.edu.tw:8080/wjmlab/PCDBM/>

The image shows a screenshot of the PCDBM web interface. At the top left, it says "PCDBM BY WJM LAB". There are three navigation buttons: "HOME", "USER", and "CONTACT US". The main content area is split into two columns. The left column has a light green background and contains a welcome message and three numbered links: "1. Searching with a gene name", "2. Submitting text queries", and "3. Uploading the text file with sequences in FASTA format". The right column has a red background and contains a search form titled "Search from database". The form includes a "Species" dropdown menu set to "Homo sapiens", a "Gene Name" text input field, "Binding Type" radio buttons for "Monomer" (selected) and "Dimer", a "Threshold (Default: 80)" text input field set to "80", and a "Submit" button. Below the form is a "List Simply" link. At the bottom of the page, there is a copyright notice: "Copyright © 2008 . All Rights Reserved. Designed by NCKU WJM Lab."

**Supplemental Figure 2.** Prediction of CEBPD-Binding Motifs (PCDBM, <http://web.ibbt.ncku.edu.tw:8080/wjmlab/PCDBM/>). This online program was designed for the prediction of CEBPD binding sites in promoters of interest. The 5'-flanking region (1 Kb upstream of The transcription start site) of genes from the three species can be retrieved by the gene name. Next, scores for predicted binding affinities for CEBPA, CEBPB, and CEBPD can be obtained from the output frame.

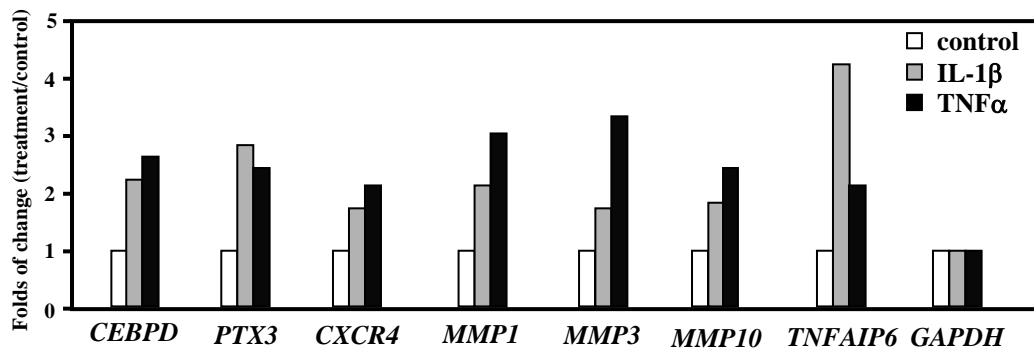

**Supplemental Figure 3.** THP-1 cells were treated with 5 ng/ml IL-1  $\beta$  , 20 ng/ml TNF  $\alpha$  for 3 h and RT-PCR of indicated genes was performed.
